# Supplementary material
Source: publisher site journal article supplement (https://www.dovepress.com/article/330313)
Supplement: Supplementary file 1 [file get_supplementary_file.php]

**Supplementary 1 C-statistic with 95% CI for LAP, WC and TG in univariable logistic regression model**

|  | **LVH** | | **AF** | | **LEA** | | **MAU** | | **CKD** | |
| --- | --- | --- | --- | --- | --- | --- | --- | --- | --- | --- |
|  | **P** | **C-statistic** | **P** | **C-statistic** | **P** | **C-statistic** | **P** | **C-statistic** | **P** | **C-statistic** |
| **LAP** | **<0.001** | **0.590(0.568-0.612)** | **<0.001** | **0.592(0.571-0.613)** | **<0.001** | **0.579(0.549-0.609)** | **<0.001** | **0.549(0.530-0.569)** | **<0.001** | **0.616(0.582-0.650)** |
| **WC** | **<0.001** | **0.589(0.566-0.612)** | **<0.001** | **0.602(0.581-0.623)** | **<0.001** | **0.597(0.568-0.626) *** | **<0.001** | **0.544(0.524-0.563)** | **<0.001** | **0.597(0.562-0.632)** |
| **TG** | **0.06** | **0.522(0.499-0.545) *** | **<0.001** | **0.554(0.532-0.575) *** | **<0.001** | **0.550(0.523-0.580) *** | **0.03** | **0.523(0.503-0.542) *** | **<0.001** | **0.594(0.560-0.628)** |

* Indicate LAP vs. WC or LAP vs.TG, P<0.05

LAP: lipid accumulation product; WC, waist circumference; TG, triglycerides; LVH: left ventricular hypertrophy; AS: arterial stiffness; LEA: lower extremity atherosclerotic; MAU: micro-albuminuria; CKD: chronic kidney disease.
